# Supplementary material for: The optimization of poly(vinyl)-alcohol-alginate beads with a slow-release compound for the aerobic cometabolism of chlorinated aliphatic hydrocarbons
Source: Royal Society of Chemistry journal article supplement (doi:10.1039/d3su00409k), 2024-01-01
Supplement: d3su00409k1.pdf [file d3su00409k1.pdf]

1 **Supplemental Information**

2 **SI1. Mineral Salt Medium**

3 Mineral salt medium (MSM) was prepared as we described in Rolston et al.(1) MSM consists of two  
4 solutions, namely Solution 1 and Solution 2. Unless otherwise noted, ultra-pure water was obtained using  
5 a PURELAB flex 1 – ELGA LabWater water purification system (Veolia Water, Paris, France). Solution 1  
6 consists of 2% (w/v) ammonium chloride (Thermo Fisher Scientific Inc), 0.075% (w/v) magnesium  
7 chloride (Mallinckrodt Baker, Inc., Phillipsburg, New Jersey, United States), 0.1% (w/v) ammonium sulfate  
8 (VWR International, Radnor, Pennsylvania, United States), and 0.2% (v/v) trace elements dissolved into  
9 ultra-pure water (**Table S1**). Before the trace elements are added to Solution 1, they are dissolved into  
10 ultra-pure water and neutralized to a pH of 7 using potassium hydroxide (Thermo Fisher Scientific Inc,  
11 Waltham, Massachusetts, United States. Solution 1.

12

13

14

15

16

17

18

19

20

21

22 **Table S1** 1X MSM solution compounds

| Solution                                | Compound                                                                                   | Concentration [% (w/v)]                                          | Final Concentration in 1X MSM [% (w/v)] |
|-----------------------------------------|--------------------------------------------------------------------------------------------|------------------------------------------------------------------|-----------------------------------------|
| 1                                       | Ammonium chloride<br>(Thermo Fisher Scientific Inc, Waltham, Massachusetts, United States) | 2.0                                                              | 0.20                                    |
|                                         | Magnesium chloride<br>(Mallinckrodt Baker)                                                 | 7.5E-02                                                          | 7.5E-03                                 |
|                                         | Ammonium sulfate<br>(VWR International)                                                    | 0.10                                                             | 1.0E-02                                 |
|                                         | Ethylenediaminetetraacetic acid<br>(VWR International)                                     | 1.0E-02                                                          | 1.0E-03                                 |
|                                         | Zinc sulfate heptahydrate<br>(Merck KGaA, Darmstadt, Germany)                              | 4.4E-03                                                          | 4.4E-04                                 |
|                                         | Manganese dichloride tetrahydrate<br>(VWR International)                                   | 1.0E-03                                                          | 1.0E-04                                 |
|                                         | Ferrous sulfate heptahydrate<br>(Mallinckrodt Baker)                                       | 1.0E-03                                                          | 1.0E-04                                 |
|                                         | Calcium chloride<br>(Merck KGaA)                                                           | 9.0E-04                                                          | 9.0E-05                                 |
|                                         | Cobalt chloride hexahydrate<br>(Sigma-Aldrich, St. Louis, Missouri, United States)         | 3.4E-04                                                          | 3.4E-05                                 |
|                                         | Copper sulfate pentahydrate<br>(Thermo Fisher Scientific Inc)                              | 3.0E-04                                                          | 3.0E-05                                 |
|                                         | Ammonium molybdate tetrahydrate<br>(Beantown Chemical Corporation, Hudson, New Hampshire)  | 2.2E-04                                                          | 2.2E-05                                 |
|                                         | 2                                                                                          | Dipotassium hydrogen phosphate<br>(Thermo Fisher Scientific Inc) | 15.5                                    |
| Monosodium phosphate<br>(Sigma-Aldrich) |                                                                                            | 8.50                                                             | 8.50E-02                                |

23

24

25 Solution 2 consists of 15.5% (w/v) dipotassium hydrogen phosphate (Thermo Fisher Scientific Inc,  
26 Waltham, Massachusetts, United States) and 8.5% (w/v) monosodium phosphate (Sigma-Aldrich, St.  
27 Louis, Missouri, United States) dissolved into ultra-pure water (**Table 1**). Solution 1 and solution 2 are  
28 autoclaved separately to ensure reactions between compounds occur. Finally, Solution 1 and Solution 2  
29 are diluted with deionized water at a 10:1:100 ratio to form a 1X MSM solution.

30

### 31 **SI2. ATCC 21198 Cell culture minimal plates**

32 ATCC 21198 was maintained on minimal medium plates in a sealed lock tight jar with 45 mL of  
33 isobutane (Gas Innovations, La Porte, Texas, United States) at 30 °C. Minimal medium plates were  
34 prepared as we previously described in Rolston et al.(1) A solution of 1.7% (w/v) Difco 247940 agar  
35 (Thermo Fisher Scientific Inc) was dissolved in ultra-pure water then autoclaved. Once cooled (~< 30  
36 °C), MSM was added to the agar solution and the solution was poured into polystyrene disposable sterile  
37 petri dishes (VWR International) to form gels. The culture is validated by streaking heterotrophic growth  
38 plates made with premixed Difco 247940 agar (Thermo Fisher Scientific Inc, Waltham, Massachusetts,  
39 United States) or with 3, 10, and 15 % (w/v) of tryptic soy, glucose, and agar, respectively, in ultra-pure  
40 water (1).

41

### 42 **SI3. ATCC 21198 liquid culturing**

43 Liquid culture growth reactors were used to grow ATCC 21198 as we previously described in Rolsten et  
44 al.(1) The growth reactors consisted of 720 mL Wheaton bottles (DWK Life Sciences Wheaton, Stoke-  
45 on-Trent, United Kingdom) sealed with screw-on caps fitted with gray butyl rubber septa (DWK Life  
46 Sciences Wheaton) filled with 300 mL of phosphate-buffered 1X MSM at a pH of 7.0 and 420 mL of air  
47 headspace. ATCC 21198 were inoculated by using an inoculating loop (VWR International) to scrape  
48 minimal medium plates (see above) and place an inoculum of ATCC 21198 into our growth reactor MSM.  
49 The bottles were then sealed, injected with 50mL of isobutane (Gas innovations, La Porte, Texas, United  
50 States) into the headspace, and placed the growth reactors on a New Brunswick Scientific G10 Gyrotory

51 shaker table (Eppendorf, Hamburg, Germany) at 200 RPM at 30 °C to incubate. Cell harvest ensued by  
52 harvesting ATCC 21198 in the late exponential growth phase by centrifugation with a Beckman J2-MI  
53 Centrifuge (Beckman Coulter Inc., Brea, California, United States) equipped with a JA-14.50 Fixed-Angle  
54 Rotor (Beckman Coulter Inc.) at 8000 RPM for 8 min in 300 mL Nalgene bottles (Thermo Fisher  
55 Scientific). Following initial centrifugation, all of the cell pellets from individual bottles were combined into  
56 50 mM monosodium phosphate (Sigma-Aldrich) at a pH of 7 and repeated centrifugation and decanting  
57 of the supernatant.

58 An aliquot of suspended cells ( $v_l$ ) was pipetted using a Finnpiette Digital 40-200  $\mu$ L pipette  
59 (Thermo Fisher Scientific) with 200  $\mu$ L pipet tips (VWR International) onto 0.2  $\mu$ m Membrane filter paper  
60 (Whatman, Maidstone, United Kingdom) with initial weight ( $m_i$ ) under vacuum to remove excess liquid.  
61 To remove the remaining liquid, we subjected the filter paper to a VWR Oven F Air 6.3CF oven (VWR  
62 International) at a temperature of 105 °C for 20 min to provide the necessary energy to dry the sample.

63 A measurement of the total suspended solids (TSS) provided the concentration of suspended  
64 cells as we previously described in Murnane et al (2). The weight of the dried solids ( $TSS$ ) was calculated  
65 as:

$$66 \quad TSS \left[ \frac{mg}{mL} \right] = \frac{m_f - m_i}{v_l} \quad (\text{Eqn. S1})$$

67 Where  $m_f$  is the weight of the dried cells,  $m_i$  is the weight of the initial mass of suspended cells, and  $v_l$  is  
68 the volume of suspended cells taken from growth reactors.

69

#### 70 **SI4. Gas chromatography details**

71 Gas chromatography was used to quantify concentrations of cDCE and oxygen in the batch bottles.  
72 Specifically, a 6890 Series gas chromatograph (Hewlett Packard, Corvallis, Oregon, United States)  
73 equipped with a micro-electron capture device (ECD) was used to quantify the cDCE. We separated  
74 cDCE from other compounds with an Agilent DB-624 UI capillary column (30 m x 0.53 mm) (Agilent  
75 Technologies, Santa Clara, California, United States) with ultra-high purity-pure helium (Airgas, Radnor,

76 Pennsylvania, United States) as the carrier gas (15 mL/min) at 50 °C to achieve retention time (RT) of  
 77 2.4 min. A 5890 Series GC II (Hewlett Packard, Corvallis, Oregon, United States) equipped with a micro-  
 78 electron capture device (ECD) was used to measure oxygen levels. We separated oxygen from other  
 79 compounds with a Supelco 60/80 Carboxen-10000 packed stainless—steel column (15 ft x 1/8 in)  
 80 (Supelco, Inc., Bellefonte, Pennsylvania, United States) with ultra-high purity-pure helium (Airgas,  
 81 Radnor, Pennsylvania, United States) as the carrier gas (30 mL min<sup>-1</sup>), at 40 °C, to achieve a retention  
 82 time (RT) of 4 min. The use of external standards supplied the calibration for all GC methods.

83

84 **SI5. Cometabolic and Metabolic experimental data**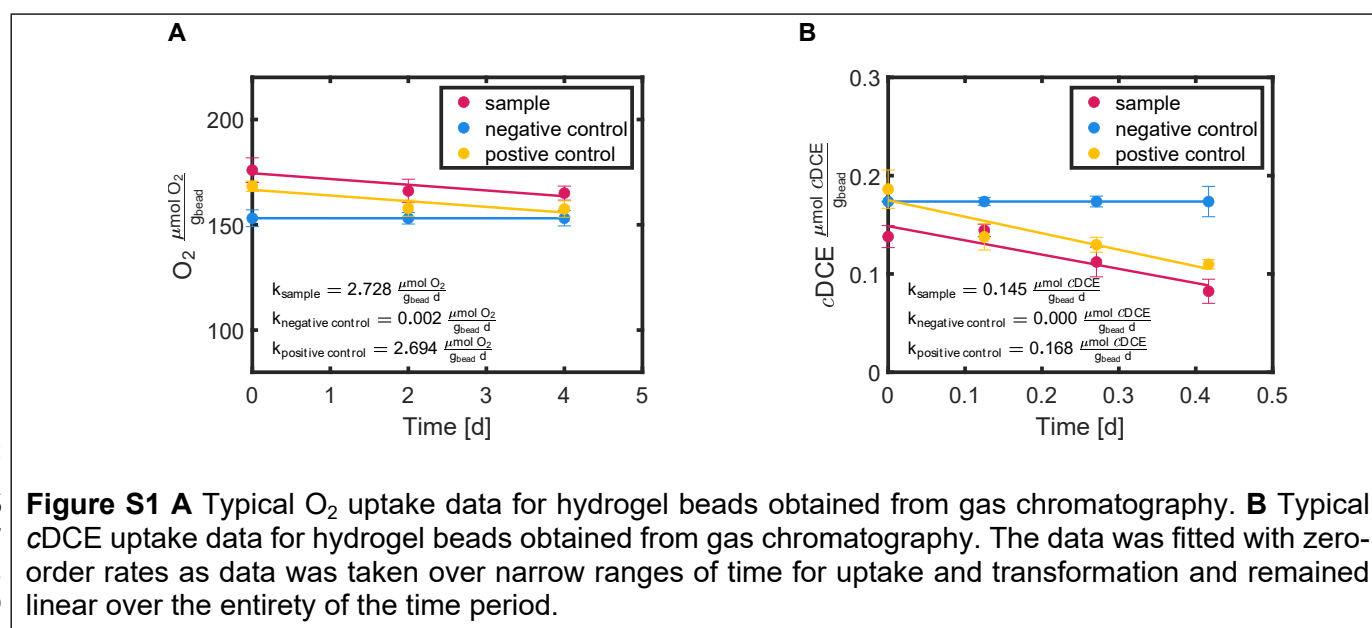

90 Metabolic activity tests were performed as described in the main text. The beads used in these  
91 experiments were formulated with the same formula as the center point of the central composite  
92 orthogonal design (Experiment No 15, **Table 2**), following the methods described in the main text  
93 (**Methods: Immobilizing ATCC 21198 and TBOS with PVA – AG beads**) and excluding the addition of  
94 PVA. Thus, the formula is comprised of 0% (w/v) PVA, 1.5% (w/v) AG, 10% (v/v) TBOS, 0.1% (v/v) Span  
95 80, and 0.5 mg/mL ATCC 21198. Negative control consists of poisoned cells. Gas chromatography (GC)  
96 data was used to evaluate the cometabolic and metabolic transformation of cDCE and O<sub>2</sub>, respectively,  
97 with ATCC 21198 immobilized in all bead formulations. See Section 2.4 in the main text for sample  
98 preparation and injections. The total mass measured from the GC was taken over time, and zero-order  
99 rate laws were applied to the data (**Figure S1A-B**). Note that zero-order rate laws were used in this study  
100 as the change in mass over time for both O<sub>2</sub> and cDCE was linear for the range of time used to determine  
101 the rates.

102

103 **SI6. Hydrogel beads before and after compression tests**

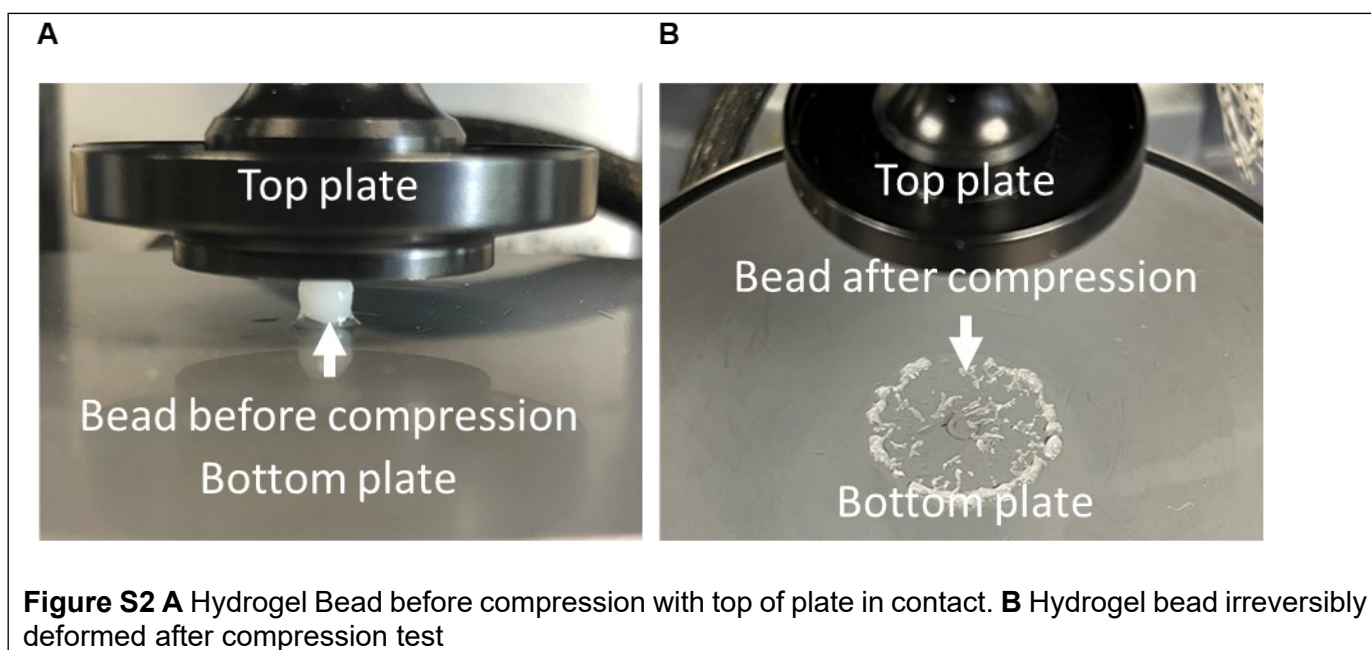

107 Hydrogel beads were irreversibly deformed during compression tests. Before compression, beads were  
108 slightly compressed such that the axial force in the rheometer exceeded 0.01 N (**Figure S2 A**). The beads

109 were compressed until the gap reached 50  $\mu\text{m}$  and were completely degraded (**Figure S2 B**).

110

111 **SI7. Compression Experimental data**

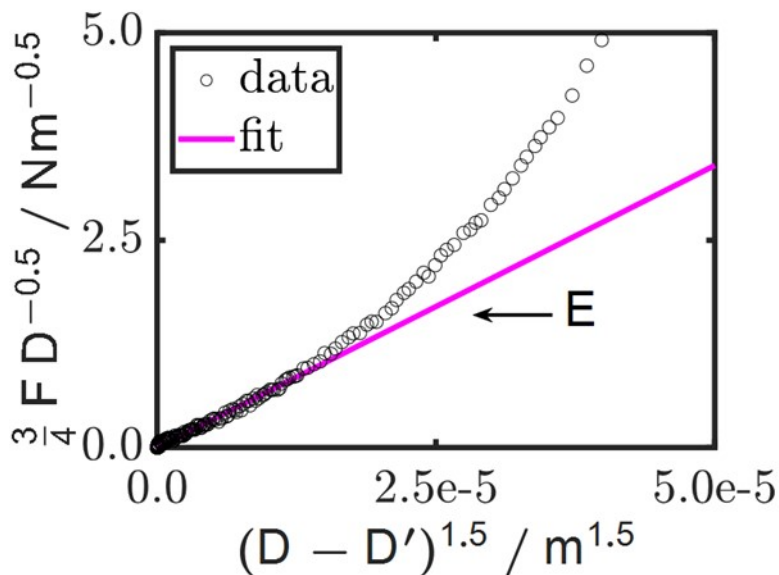

112  
113 **Figure S3** Typical stress-strain data for hydrogel beads obtained from compression tests.

114 Uniaxial compression measurements were performed on hydrogel beads to obtain the compressive  
115 modulus,  $E$  (**Figure S3**). The Hertz equation (Eq. 3) can be rearranged and plotted with  
116  $3/4 F D^{-0.5}$  against  $\Delta D = (D - D')^{1.5}$ . The compressive modulus,  $E$ , is taken as the slope of the linear portion  
117 of the curve between a small range of deformation. After the small deformation ranges, the data  
118 transitions to an exponential growth. The linear portion was selected by taking the first point as the start  
119 and where the absolute value of the second derivative of the data exceeded 0.01. We approximated the  
120 second derivative using the `diff()` function in MATLAB.

121

122 **SI8. Design of experiments statistical method**

123 The software MODDE-Pro 12.1 (Sartorius, Fremont, California, United States) was used to  
124 generate the CCO experimental matrix and analyze the experimental data obtained. Multiple linear  
125 regression was used to obtain predictive models for each response variable. Experimental data was  
126 obtained first and used to fit models. Singular value decomposition was used to obtain regression  
127 coefficients. Analysis of variance (ANOVA) tests were used to determine the statistical analysis of the



128 experimental data and regression coefficients, and to obtain interactions between the variables and the  
 129 responses. A desirability function approach was applied to identify the optimized condition that produced  
 130 the most desirable responses on dependent variables. The quadratic equations used in DOE for all four  
 131 dependent variables were:

$$132 \quad y = \beta_0 + \beta_1 C_{PVA} + \beta_2 C_{AG} + \beta_3 t_{xlink} + \beta_{11} C_{PVA}^2 + \beta_{22} C_{AG}^2 + \beta_{33} t_{xlink}^2 + \beta_{12} C_{PVA} C_{AG} + \beta_{13} C_{PVA} t_{xlink} + \beta_{23} C_{AG} t_{xlink} + \epsilon$$

133 (Eqn. 10)

134 where  $y$  is the dependent variable, either  $E_1$ ,  $E_{30}$ ,  $k_{O_2,1}$ , or  $k_{O_2,1}$ ;  $\beta$  coefficients represent the overall  
 135 population value of the response ( $\beta_0$ ), the population values for independent variables, and the population  
 136 values for interactions between the independent variables; and  $\epsilon$  is the random error of the response.

137 Factor effect plots were used to compare the individual contributions of each factor on each of the  
 138 responses measured. Each input factor was varied over its specific range while all the other input factors  
 139 were held constant at their averages. In contrast, response surface maps were used to evaluate the  
 140 individual and combinatorial effects of multiple input variables on each of the responses measured. Both  
 141 factor effect plots and response surface maps were generated from the predictive equations for each  
 142 response as a function of the three input factors.

143

144

#### 145 **SI9. *cis*-1,2-dichloroethylene (cDCE) rate data design of experiments models**

146 We fit cDCE rate data on 1 and 30 days ( $k_{cDCE,1}$  and  $k_{cDCE,30}$ ) described in the main text under Section 3.1  
 147 with second order multivariate regression models and eliminated terms that were not statistically  
 148 significant. Experimental and predicted data are shown for all bead formulae tested with the central  
 149 composite design described in the main text (**Table S2**). This data was not used to optimize the bead  
 150 parameters and therefore was excluded from the main text. The models were evaluated based on the  
 151 criteria provided in the main text under Section 3.3. That is, the statistical significance of each model was  
 152 then evaluated with ANOVA tests, with a  $p$ -value of  $< 0.05$  indicating a significant model and a  $p$ -value  $>$   
 153  $0.10$  for lack of fit indicating a model with a negligible pure error. We provide the ANOVA assessment for

154 the  $k_{cDCE,1}$  and  $k_{cDCE,30}$  regression models to demonstrate that the models were statistically significant and  
 155 had negligible pure error (**Table S3**). The unscaled models obtained for  $k_{cDCE,1}$  and  $k_{cDCE,30}$  were:

$$k_{cDCE,1} = -0.15 + 0.26C_{PVA} - 1.9C_{AG} - 0.05t_{xlink} - 0.19C_{PVA}^2 - 0.93C_{AG}^2 + 1 \times 10^{-4}t_{xlink}^2 + 4.1 \times 10^{-3}C_{AG}t_{xlink}$$

156  
157 (Eqn. S1)

$$k_{cDCE,30} = 0.074 - 0.16C_{AG} - 2.7 \times 10^{-3}t_{xlink}$$

158 (Eqn. S2)

159 The factor effects and predictions for  $k_{cDCE,1}$  and  $k_{cDCE,30}$  regression models are provided to  
 160 identify the effects of the inputs ( $C_{PVA}$ ,  $C_{AG}$ ,  $t_{xlink}$ ) on these outputs (**Figure S4**). Both  $C_{PVA}$  and  $C_{AG}$  had a  
 161 negative quadratic influence on  $k_{cDCE,1}$ , whereas  $t_{xlink}$  had a positively quadratic influence (**Figure S4A**).  
 162 The maximum point of  $k_{cDCE,1}$  was predicted to occur below the midpoint for  $C_{PVA}$  ( $C_{PVA} < 2\%$  w/v) and  
 163 near the midpoint for  $C_{AG}$  ( $C_{AG} \sim 1.5\%$  w/v), when  $t_{xlink}$  was held constant at  $t_{xlink} = 75$  min (**Figure S4B**).  
 164 For the factor effect plot for  $k_{cDCE,30}$ ,  $C_{PVA}$  was shown to have no effect, whereas both  $C_{AG}$  and  $t_{xlink}$  had a  
 165 negative linear effect on the response (**Figure S4C**). Thus, the maximum of point of  $k_{cDCE,30}$  was  
 166 predicted to occur at the low value of  $C_{AG}$  where  $t_{xlink}$  was held constant at  $t_{xlink} = 75$  min (**Figure S4D**).  
 167 While these data could be used to maximize the bioremediation capability, the objective of this research  
 168 was to maintain strong beads and to ensure that transformation of cDCE was not inhibited by the  
 169 immobilization process. Thus, these models were excluded from the main text.

170 **Table S2** Bead formulae for each experiment, generated by a central composite orthogonal design, plus an  
 171 additional bead formulation (optimal bead). Experimental and predicted data for  $k_{cDCE,1}$  and  $k_{cDCE,30}$  are shown for  
 172 each experimental condition.

| No. | $C_{PVA}$<br>[% (w/v)] | $C_{AG}$<br>[% (w/v)] | $t_{xlink}$ [min] | $k_{cDCE,1}$<br>[ $\frac{\mu mol\ cDCE}{g_{bead}\ d}$ ] |       | $k_{cDCE,30}$<br>[ $\frac{\mu mol\ cDCE}{g_{bead}\ d}$ ] |       |
|-----|------------------------|-----------------------|-------------------|---------------------------------------------------------|-------|----------------------------------------------------------|-------|
|     |                        |                       |                   | Exp.                                                    | Pred. | Exp.                                                     | Pred. |
| 1   | 1.0                    | 1.0                   | 30.0              | 0.15 ± 0.06                                             | 0.33  | 0.65 ± 0.16                                              | 0.65  |
| 2   | 3.0                    | 1.0                   | 30.0              | 0.16 ± 0.03                                             | 0.16  | 0.67 ± 0.17                                              | 0.65  |
| 3   | 1.0                    | 2.0                   | 30.0              | 0.24 ± 0.09                                             | 0.23  | 0.64 ± 0.17                                              | 0.49  |
| 4   | 3.0                    | 2.0                   | 30.0              | 0.05 ± 0.01                                             | 0.06  | 0.36 ± 0.20                                              | 0.49  |
| 5   | 1.0                    | 1.0                   | 120.0             | 0.02 ± 0.01                                             | 0.03  | 0.46 ± 0.04                                              | 0.41  |
| 6   | 3.0                    | 1.0                   | 120.0             | 0.04 ± 0.01                                             | 0.03  | 0.43 ± 0.15                                              | 0.41  |
| 7   | 1.0                    | 2.0                   | 120.0             | 0.12 ± 0.01                                             | 0.11  | 0.28 ± 0.05                                              | 0.25  |
| 8   | 3.0                    | 2.0                   | 120.0             | 0.08 ± 0.02                                             | 0.11  | 0.27 ± 0.04                                              | 0.25  |
| 9   | 0.6                    | 1.5                   | 75.0              | 0.13 ± 0.02                                             | 0.13  | 0.34 ± 0.07                                              | 0.45  |
| 10  | 3.4                    | 1.5                   | 75.0              | 0.04 ± 0.01                                             | 0.02  | 0.21 ± 0.06                                              | 0.45  |
| 11  | 2.0                    | 0.8                   | 75.0              | 0.05 ± 0.01                                             | 0.06  | 0.34 ± 0.04                                              | 0.56  |
| 12  | 2.0                    | 2.2                   | 75.0              | 0.06 ± 0.01                                             | 0.04  | 0.36 ± 0.06                                              | 0.34  |
| 13  | 2.0                    | 1.5                   | 14.1              | 0.15 ± 0.04                                             | 0.37  | 0.15 ± 0.04                                              | 0.61  |
| 14  | 2.0                    | 1.5                   | 135.9             | 0.21 ± 0.08                                             | 0.20  | 0.23 ± 0.02                                              | 0.29  |
| 15  | 2.0                    | 1.5                   | 75.0              | 0.14 ± 0.09                                             | 0.15  | 0.36 ± 0.02                                              | 0.45  |
| opt | 3.2                    | 2.0                   | 110               | 0.10 ± 0.01                                             | 0.05  | 0.17 ± 0.02                                              | 0.27  |

173  
174

175 **Table S3** ANOVA assessment for  $k_{cDCE,1}$  and  $k_{cDCE,30}$  regression models.

| <b>Response</b>                  | $k_{cDCE,1}$ | $k_{cDCE,30}$ |
|----------------------------------|--------------|---------------|
| <b>p-values</b>                  |              |               |
| <b>Model</b>                     | <0.0001      | <0.0001       |
| $C_{PVA}$                        | 0.0031       | -             |
| $C_{AG}$                         | 0.5862       | 0.0097        |
| $t_{xlink}$                      | 0.0011       | 0.0007        |
| $C_{PVA}^2$                      | 0.0130       | -             |
| $C_{AG}^2$                       | 0.0031       | -             |
| $t_{xlink}^2$                    | 0.0012       | -             |
| $C_{PVA}C_{AG}$                  | -            | -             |
| $C_{PVA}t_{xlink}$               | 0.0095       | -             |
| $C_{AG}t_{xlink}$                | 0.0085       | -             |
| <b>Lack of fit</b>               | 0.8300       | 0.1760        |
| <b>Validation Metrics</b>        |              |               |
| <b>Total Sample Size (N)</b>     | 15           | 13            |
| <b>Degree of Freedom (DF)</b>    | 6            | 10            |
| <b><math>R^2</math></b>          | 0.93         | 0.77          |
| <b><math>R^2</math>-adjusted</b> | 0.85         | 0.72          |
| <b><math>Q^2</math></b>          | 0.65         | 0.58          |

176

177

178

179

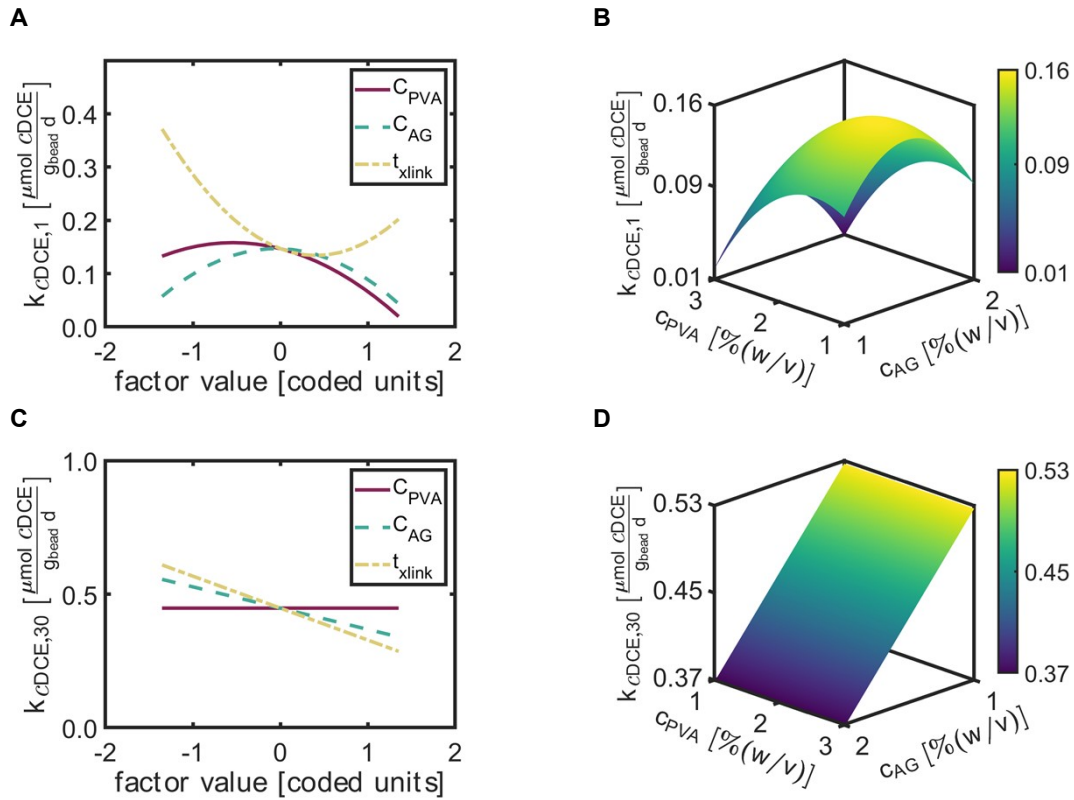

**Figure S4** The factor effect plots (left column) include all input variables,  $C_{PVA}$ ,  $C_{AG}$ , and  $t_{xlink}$  denoted with red (solid), green (dashed), and yellow (dashed-dotted) lines, respectively. 3-D response surface plots (right column) consist of the output response on the z-axis predicted for a range (factor value  $\in [-1, 1]$  / [coded units]) of  $C_{PVA}$  and  $C_{AG}$  on the x and y-axes, respectively and constant  $t_{xlink} = 75$  [min]. The color bar represents the magnitude of the response from low (purple) to high (yellow). **A** Factor effect plot of  $k_{CDCE,1}$ . **B** 3-D response surface map of  $k_{CDCE,1}$ . **C** Factor effect plot of  $k_{CDCE,30}$ . **D** 3-D response surface map of  $k_{CDCE,30}$ .

180

181

182

183 **SI10. Metabolic Activity Control: Rate of oxygen utilization at day 1, alginate only bead controls**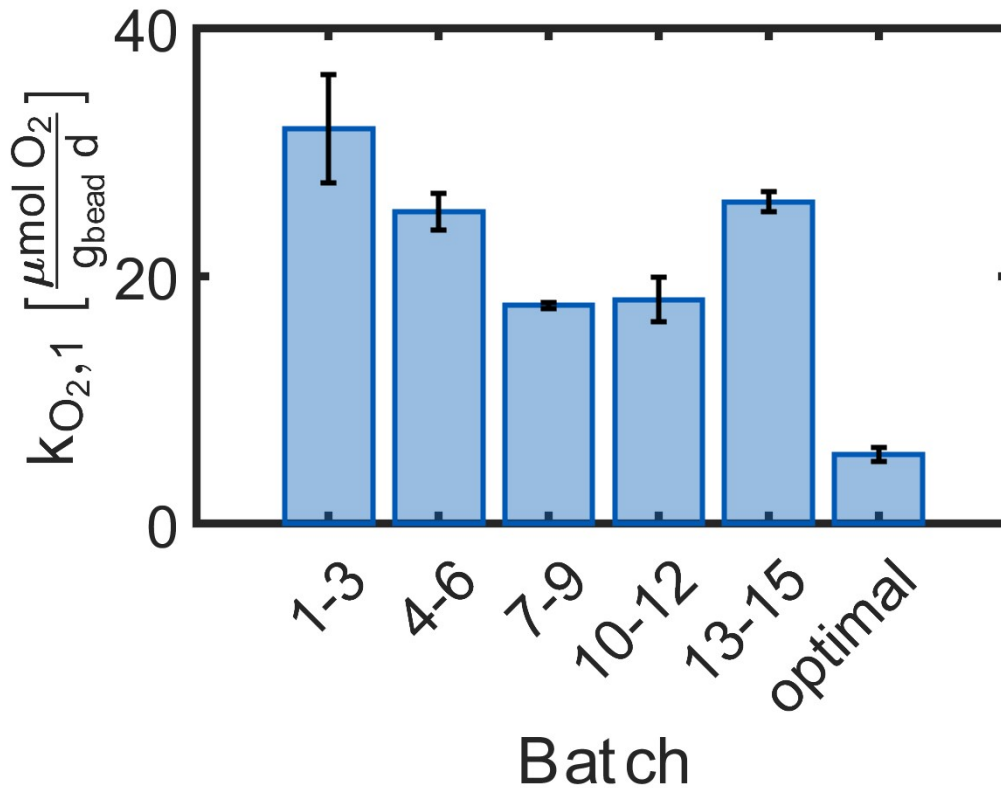

184

185 **Figure S5. A** Rates of oxygen utilization measured for controls for batches made throughout this study.  
 186 All data are expressed as average  $\pm$  SD,  $n = 3$ . Rates are similar between the first 5 batches (1-3,4-6,7-  
 187 9,10-12,13-15), but the optimal batch was observed at a much higher rate.

188

189 Metabolic activity tests were performed as described in the main text. The beads used in these  
 190 experiments were formulated with the same formula as the center point of the central composite  
 191 orthogonal design (Experiment No 15, **Table 2**), following the methods described in the main text  
 192 (**Methods: Immobilizing ATCC 21198 and TBOS with PVA – AG beads**) and excluding the addition of  
 193 PVA. Thus, the formula is comprised of 0% (w/v) PVA, 1.5% (w/v) AG, 10% (v/v) TBOS, 0.1% (v/v) Span  
 194 80, and 0.5 mg/mL ATCC 21198. 2g of beads were added to 150 mL batch reactors and placed on a  
 195 shaker table and oxygen was measured on a GC, as described in the main text. The control was made  
 196 with each batch of beads, indicated by the batch id (1-3, 4-6, 7-9, 10-12, 13-15, optimal). Six controls

197 were completed throughout the testing with three replicates, each. Between each batch, the oxygen rates  
 198 for the control bottles were variable (**Figure S5**). Batches 4-6 and 13-15, and batches 7-9 and 10-12  
 199 were observed to have similar rates. The optimal batch was measured to have the lowest rate of oxygen  
 200 utilization rate between all batches, which was likely due to the change in a 90% purity TBOS to a 98%  
 201 purity TBOS described in the main text (**Section 2.2**). This data suggests that there could be differences  
 202 between live/dead cells immobilized in the beads.

203

204 **SI11. Compression tests under abiotic conditions**

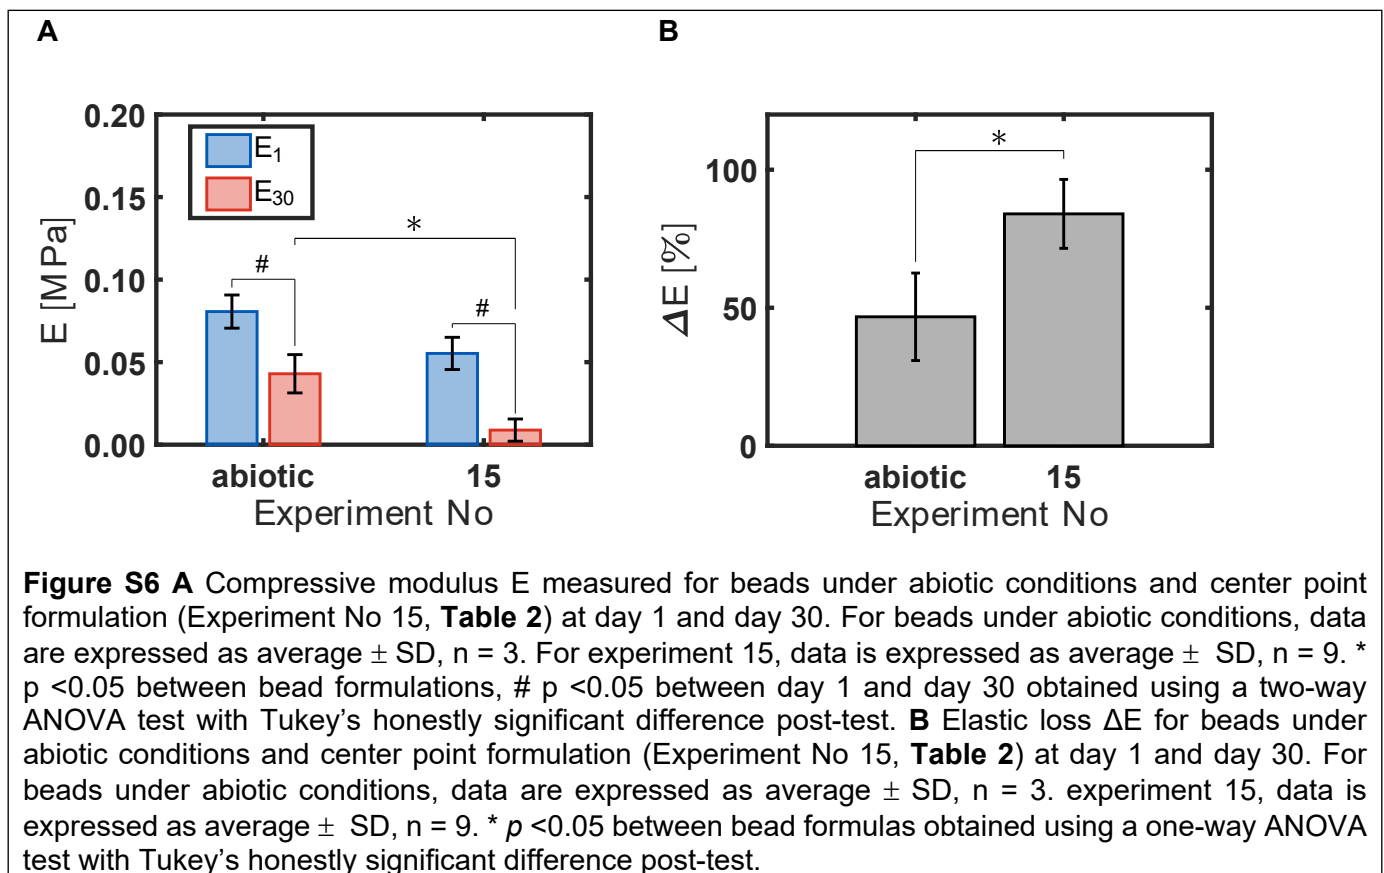

205

206 **Figure S6 A** Compressive modulus E measured for beads under abiotic conditions and center point  
 207 formulation (Experiment No 15, **Table 2**) at day 1 and day 30. For beads under abiotic conditions, data  
 208 are expressed as average  $\pm$  SD, n = 3. For experiment 15, data is expressed as average  $\pm$  SD, n = 9. \*  
 209 p < 0.05 between bead formulations, # p < 0.05 between day 1 and day 30 obtained using a two-way  
 210 ANOVA test with Tukey's honestly significant difference post-test. **B** Elastic loss  $\Delta E$  for beads under  
 211 abiotic conditions and center point formulation (Experiment No 15, **Table 2**) at day 1 and day 30. For  
 212 beads under abiotic conditions, data are expressed as average  $\pm$  SD, n = 3. experiment 15, data is  
 213 expressed as average  $\pm$  SD, n = 9. \* p < 0.05 between bead formulas obtained using a one-way ANOVA  
 214 test with Tukey's honestly significant difference post-test.

215

216 Beads with autoclaved cells were used to evaluate the abiotic degradation of beads. Compression tests  
 217 were performed as described in the main text. Beads under abiotic conditions were formulated with the  
 218 same formula as the center point of the central composite orthogonal design (Experiment No 15, **Table**

219 **2)**, following the methods described in the main text (**Methods: Immobilizing ATCC 21198 and TBOS**  
220 **with PVA – AG beads**) with autoclaved cells. 2g of beads were added to 150 mL batch reactors and  
221 placed on a shaker table and removed on day 1 and day 30 for tests with compression, as described in  
222 the main text.

223 For the same bead type, we compared the elastic loss between the beads that were poisoned and beads  
224 that were not after 30 days. The abiotic bead was observed to maintain a higher compressive modulus  
225 at 30 days when compared to beads with live cells (**Figure S6A**). Moreover, the elastic loss observed for  
226 the abiotic bead was near half the elastic loss observed for the beads incubated with live cells (**Figure**  
227 **S6B**). This data suggests that live cells can alter the hydrogel structure and properties, likely due to the  
228 proliferation of cells inside the beads.

229



230

231

- 232 1. Rolston HM, Hyman MR, Semprini L. Aerobic cometabolism of 1,4-dioxane by isobutane-utilizing  
233 microorganisms including *Rhodococcus rhodochrous* strain 21198 in aquifer microcosms: Experimental and  
234 modeling study. *Science of The Total Environment*. 2019 Dec;694:133688.
- 235 2. Murnane RA, Chen W, Hyman M, Semprini L. Long-term cometabolic transformation of 1,1,1-  
236 trichloroethane and 1,4-dioxane by *Rhodococcus rhodochrous* ATCC 21198 grown on alcohols slowly  
237 produced by orthosilicates. *Journal of Contaminant Hydrology*. 2021 Jun;240:103796.

238
